# Supplementary material
Source: PubMed Central journal article supplement (PMC3482415)
Supplement: NIHMS384727-supplement-supplement_1.pdf [file NIHMS384727-supplement-supplement_1.pdf]

**Supplemental Table 1: Results from prior association studies of obesity and BMI**

| SNP        | Gene   | Risk allele | First author, reference number | Study        | phenotype            | Effect Size (95% CI)            | Risk allele frequency | p-value | N                                            | Effect Size used in power calculations      |
|------------|--------|-------------|--------------------------------|--------------|----------------------|---------------------------------|-----------------------|---------|----------------------------------------------|---------------------------------------------|
| rs2815752  | NEGR1  | T           | Cotsapas, 7                    | case-control | obesity <sup>a</sup> | 1.11 (0.98 - 1.25) <sup>h</sup> | 0.65                  | 0.035   | 775 cases, 3197 controls                     | 0.10<br>(beta for BMI, Willer et al.)       |
|            |        |             | Renstrom, 16                   | case-control | obesity              | 1.10 (1.01 - 1.20)              | 0.58                  | 0.028   | 353 cases, 1370 controls                     |                                             |
|            |        |             | Willer, 8                      | GWAS         | BMI                  | 0.10 (0.04 - 0.16) <sup>c</sup> | 0.62                  | 6.0E-08 | 83,499                                       |                                             |
| rs6548238  | TMEM18 | C           | Cotsapas, 7                    | case-control | obesity <sup>a</sup> | 1.17 (1.01 - 1.37) <sup>h</sup> | 0.82                  | 0.016   | 775 cases, 3197 controls                     | 0.26<br>(beta for BMI, Willer et al.)       |
|            |        |             | Renstrom, 16                   | case-control | obesity              | 1.10 (0.98 - 1.22)              | 0.82                  | 0.095   | 353 cases, 1370 controls                     |                                             |
|            |        |             | Willer, 8                      | GWAS         | BMI                  | 0.26 (0.19 - 0.34) <sup>c</sup> | 0.84                  | 1.4E-18 | 84,823                                       |                                             |
| rs10938397 | GNPDA2 | G           | Cotsapas, 7                    | case-control | obesity <sup>a</sup> | 1.18 (1.06 - 1.32)              | 0.43                  | 1.7E-03 | 775 cases, 3197 controls                     | 0.19<br>(beta for BMI, Willer et al.)       |
|            |        |             | Renstrom, 16                   | case-control | obesity              | 1.10 (1.00 - 1.20)              | 0.37                  | 0.045   | 353 cases, 1370 controls                     |                                             |
|            |        |             | Willer, 8                      | GWAS         | BMI                  | 0.19 (0.13 - 0.25) <sup>c</sup> | 0.45                  | 3.4E-16 | 81,758                                       |                                             |
| rs10838738 | MTCH2  | G           | Cotsapas, 7                    | case-control | obesity <sup>a</sup> | 1.09 (0.97 - 1.23)              | 0.35                  | 0.063   | 775 cases, 3197 controls                     | 0.07<br>(beta for BMI, Willer et al.)       |
|            |        |             | Willer, 8                      | GWAS         | BMI                  | 0.07 (0.01 - 0.13) <sup>c</sup> | 0.34                  | 4.6E-09 | 80,917                                       |                                             |
| rs7498665  | SH2B1  | G           | Cotsapas, 7                    | case-control | obesity <sup>a</sup> | 1.12 (1.00 - 1.26)              | 0.37                  | 0.022   | 775 cases, 3197 controls                     | 0.15<br>(beta for BMI, Willer et al.)       |
|            |        |             | Thorleifsson, 12               | GWAS         | obesity              | 3.63 (2.49 - 4.77)              | NR                    | 3.0E-10 | >68,000                                      |                                             |
|            |        |             | Renstrom, 16                   | case-control | obesity              | 1.13 (1.04 - 1.24)              | 0.4                   | 7.0E-03 | 353 cases, 1370 controls                     |                                             |
|            |        |             | Thorleifsson, 12               | GWAS         | BMI                  | 3.63 (2.49 - 4.77) <sup>g</sup> | NR                    | 1.0E-09 | >68,000                                      |                                             |
|            |        |             | Willer, 8                      | GWAS         | BMI                  | 0.15 (0.08 - 0.21) <sup>c</sup> | 0.41                  | 5.1E-11 | 86,677                                       |                                             |
| rs1121980  | FTO    | A           | Hinney, 10                     | case-control | obesity <sup>b</sup> | 1.66 (1.37 - 2.01)              | .41 (controls)        | 1.0E-07 | 487 cases, 442 controls                      | 0.59<br>(beta for BMI, Scuteri et al.)      |
|            |        |             | Renstrom, 16                   | case-control | obesity              | 1.15 (1.05 - 1.25)              | 0.42                  | 2.0E-03 | 353 cases, 1370 controls                     |                                             |
|            |        |             | Scuteri, 11                    | GWAS         | BMI                  | 0.13 SD <sup>fh</sup>           | 0.45                  | 1.4E-06 | 6,148; including 1407 imputed family members |                                             |
|            |        | NR          | Loos, 6                        | GWAS         | lnBMI                | 0.06 (0.04 - 0.08) <sup>d</sup> | NR                    | 4.0E-08 | 77,228                                       |                                             |
| rs3751812  | FTO    | T           | Thorleifsson, 12               | GWAS         | BMI                  | 8.09 (6.99 - 9.19) <sup>g</sup> | NR                    | 4.1E-47 | >68,000                                      | 0.36<br>(beta for BMI, Thorleifsson et al.) |
|            |        |             | Grant, 3                       | case-control | obesity <sup>e</sup> | 1.27 (1.08 - 1.47)              | .39 (controls)        | 2.2E-03 | 418 cases, 2270 controls                     |                                             |
| rs8050136  | FTO    | A           | Hinney, 10                     | case-control | obesity <sup>b</sup> | 1.59 (1.31 - 1.92)              | .39 (controls)        | 9.8E-06 | 487 cases, 442 controls                      | 0.36<br>(beta for BMI, Thorleifsson et al.) |
|            |        |             | Thorleifsson, 12               | GWAS         | obesity              | 1.27 (1.21 - 1.32)              | NR                    | 3.0E-26 | >68,000                                      |                                             |
|            |        |             | Bressler, 18 <sup>i</sup>      | case-control | obesity              | 1.21 (1.13 - 1.29)              | .37 (controls)        | <0.001  | 2470 cases, 4065 controls                    |                                             |
|            |        |             | Scuteri, 11                    | GWAS         | BMI                  | 0.13 SD <sup>fh</sup>           | 0.46                  | 1.1E-06 | 6,148; including 1407 imputed family members |                                             |
|            |        |             | Thorleifsson, 12               | GWAS         | BMI                  | 8.04 (6.96 - 9.12) <sup>g</sup> | NR                    | 1.0E-47 | >68,000                                      |                                             |

Supplemental Table 1: (continued)

| SNP        | Gene   | Risk allele | Study                           | Study design  | phenotype            | Effect Size (95% CI)             | Risk allele frequency | p-value | N                                            | Effect Size used in power calculations |
|------------|--------|-------------|---------------------------------|---------------|----------------------|----------------------------------|-----------------------|---------|----------------------------------------------|----------------------------------------|
| rs9930506  | FTO    | G           | Scuteri, 11                     | GWAS          | BMI                  | 0.13 SD <sup>f h</sup>           | 0.46                  | 8.6E-07 | 6,148; including 1407 imputed family members | 0.59<br>(beta for BMI, Scuteri et al.) |
| rs9939609  | FTO    | A           | Cotsapas, 7                     | case-control  | obesity <sup>a</sup> | 1.46 (1.31 - 1.64)               | 0.42                  | 1.4E-11 | 775 cases, 3197 controls                     | 0.33<br>(beta for BMI, Willer et al.)  |
|            |        |             | Hinney, 10                      | case-control  | obesity <sup>b</sup> | 1.57 (1.30 - 1.89)               | .39 (controls)        | 1.9E-06 | 487 cases, 442 controls                      |                                        |
|            |        |             | Bressler, 18 <sup>i</sup>       | case-control  | obesity              | 1.22 (1.14 - 1.30)               | .37 (controls)        | <0.001  | 2470 cases, 4065 controls                    |                                        |
|            |        |             | Frayling, 17                    | meta-analysis | obesity              | 1.32 (1.26 - 1.39)               | 0.39                  | 3.0E-26 | 38,759                                       |                                        |
|            |        |             | Scuteri, 11                     | GWAS          | BMI                  | 0.13 SD <sup>f h</sup>           | 0.46                  | 1.8E-06 | 6,148; including 1407 imputed family members |                                        |
| Willer, 8  | GWAS   | BMI         | 0.33 (0.27 - 0.39) <sup>c</sup> | 0.41          | 4.3E-51              | 83,384                           |                       |         |                                              |                                        |
| rs12970134 | MC4R   | A           | Thorleifsson, 12                | GWAS          | BMI                  | 4.38 (3.16 - 5.60) <sup>e</sup>  | NR                    | 1.2E-12 | >68,000                                      | 0.20                                   |
|            |        |             | Thorleifsson, 12                | GWAS          | obesity              | 1.12 (1.06 - 1.17)               | NR                    | 9.9E-06 | >68,000                                      | (beta for BMI, Thorleifsson et al.)    |
| rs17782313 | MC4R   | C           | Cotsapas, 7                     | case-control  | obesity <sup>a</sup> | 1.02 (0.90 - 1.17)               | 0.24                  | 0.36    | 775 cases, 3197 controls                     | 0.20<br>(beta for BMI, Willer et al.)  |
|            |        |             | Meyre, 13                       | case-control  | obesity              | 1.22 (1.05 - 1.40)               | NR                    | 5.0E-15 | 1380 cases, 1416 controls                    |                                        |
|            |        |             | Renstrom, 16                    | case-control  | obesity              | 1.11 (1.00 - 1.22)               | 0.26                  | 0.042   | 353 cases, 1370 controls                     |                                        |
|            |        |             | Willer, 8                       | GWAS          | BMI                  | 0.20 (0.12 - 0.28) <sup>c</sup>  | 0.21                  | 4.6E-18 | 80,747                                       |                                        |
|            |        |             | Loos, 6                         | GWAS          | BMI                  | 0.05 (0.04 - 0.06) <sup>d</sup>  | NR                    | 3.0E-15 | 77,228                                       |                                        |
| rs11084753 | KCTD15 | G           | Cotsapas, 7                     | case-control  | obesity <sup>a</sup> | 1.15 (1.02 - 1.30) <sup>h</sup>  | 0.69                  | 0.013   | 775 cases, 3197 controls                     | 0.06<br>(beta for BMI, Willer et al.)  |
|            |        |             | Renstrom, 16                    | case-control  | obesity              | 1.05 (0.96 - 1.14) <sup>h</sup>  | 0.63                  | 0.330   | 353 cases, 1370 controls                     |                                        |
|            |        |             | Willer, 8                       | GWAS          | BMI                  | 0.06 (-0.01 - 0.13) <sup>c</sup> | 0.67                  | 2.3E-08 | 71,706                                       |                                        |

NR: Not reported; OR: Odds Ratio; obesity defined as BMI ≥ 30

<sup>a</sup>: "extreme obesity", defined as BMI > 40;

<sup>b</sup>: "early onset extreme obesity", defined as children and adolescents (mean age ~14) receiving inpatient hospital treatment for obesity

<sup>c</sup>: beta for per-allele change in BMI (kg/m<sup>2</sup>)

<sup>d</sup>: beta for per-allele change in lnBMI

<sup>e</sup>: "obese" defined as BMI ≥ 95th percentile

<sup>f</sup>: beta for change in standard deviations

<sup>g</sup>: beta for change in percentile of standard deviations

<sup>h</sup>: study used opposite risk allele as PAGE, therefore opposite effect size and CIs are presented in table

<sup>i</sup>: includes European American subjects from CALiCo also included in PAGE analyses

**Supplementary Table 2: Meta-analysis of linear regression of putative obesity-related SNPs and natural log BMI, stratified by racial/ethnic group and adjusted for ancestry principal component:**

| Gene   | SNP        | Location | CA | European Americans      |          |       | Hispanics |                           |         | African Americans |      |                         |          |      |      |
|--------|------------|----------|----|-------------------------|----------|-------|-----------|---------------------------|---------|-------------------|------|-------------------------|----------|------|------|
|        |            |          |    | Effect Size (95% CI)    | p-value  | N     | AF        | Effect Size (95% CI)      | p-value | N                 | AF   | Effect Size (95% CI)    | p-value  | N    | AF   |
| NEGR1  | rs2815752  | 1p31.1   | T  | 0.006 (0.001 - 0.01)    | 0.01     | 22774 | 0.62      | 0.0001 (-0.012 - 0.012)   | 0.98    | 2767              | 0.71 | 0.001 (-0.005 - 0.008)  | 0.67     | 7807 | 0.54 |
| TMEM18 | rs6548238  | 2p25.3   | C  | 0.008 (0.003 - 0.014)   | 2.49E-03 | 22406 | 0.83      | 0.005 (-0.01 - 0.021)     | 0.50    | 2767              | 0.86 | 0.009 (-0.0001 - 0.018) | 0.05     | 8541 | 0.88 |
| GNPDA2 | rs10938397 | 4p12     | G  | 0.005 (0.001 - 0.009)   | 0.01     | 22753 | 0.43      | 0.009 (-0.003 - 0.020)    | 0.13    | 2744              | 0.39 | 0.013 (0.006 - 0.020)   | 4.88E-04 | 8479 | 0.25 |
| MTCH2  | rs10838738 | 11p11.2  | G  | 0.005 (0.001 - 0.009)   | 0.02     | 22784 | 0.35      | 0.005 (-0.006 - 0.016)    | 0.37    | 2769              | 0.36 | 0.004 (-0.007 - 0.014)  | 0.51     | 8512 | 0.10 |
| SH2B1  | rs7498665  | 16p11.2  | G  | 0.002 (-0.002 - 0.006)  | 0.37     | 22749 | 0.38      | -0.011 (-0.022 - -0.0001) | 0.05    | 2761              | 0.43 | 0.008 (0.001 - 0.014)   | 0.03     | 8518 | 0.27 |
| FTO    | rs1121980  | 16q12.12 | A  | 0.015 (0.011 - 0.019)   | 1.05E-11 | 21426 | 0.43      | 0.008 (-0.045 - 0.061)    | 0.77    | 426               | 0.37 | 0.005 (-0.005 - 0.014)  | 0.32     | 3545 | 0.47 |
| FTO    | rs3751812  | 16q12.12 | T  | 0.015 (0.011 - 0.020)   | 4.97E-12 | 21918 | 0.55      | 0.013 (-0.005 - 0.032)    | 0.17    | 1911              | 0.28 | 0.013 (-0.007 - 0.032)  | 0.20     | 3959 | 0.11 |
| FTO    | rs8050136  | 16q12.12 | A  | 0.015 (0.011 - 0.019)   | 3.51E-12 | 22788 | 0.41      | 0.019 (0.007 - 0.030)     | 0.002   | 2874              | 0.29 | 0.005 (-0.001 - 0.012)  | 0.10     | 8028 | 0.43 |
| FTO    | rs9930506  | 16q12.12 | G  | 0.014 (0.010 - 0.019)   | 4.71E-11 | 21783 | 0.44      | 0.017 (-0.002 - 0.035)    | 0.07    | 1912              | 0.32 | 0.005 (-0.005 - 0.014)  | 0.34     | 6610 | 0.21 |
| FTO    | rs9939609  | 16q12.12 | A  | 0.015 (0.011 - 0.020)   | 4.92E-12 | 21769 | 0.41      | -0.002 (-0.053 - 0.049)   | 0.93    | 449               | 0.33 | 0.003 (-0.006 - 0.012)  | 0.54     | 3588 | 0.47 |
| MC4R   | rs12970134 | 18q22    | A  | 0.007 (0.002 - 0.012)   | 4.00E-03 | 21770 | 0.26      | -0.027 (-0.077 - 0.022)   | 0.28    | 448               | 0.17 | 0.008 (-0.006 - 0.021)  | 0.25     | 3588 | 0.13 |
| MC4R   | rs17782313 | 18q22    | C  | 0.006 (0.001 - 0.011)   | 0.02     | 22736 | 0.23      | 0.003 (-0.012 - 0.019)    | 0.69    | 2769              | 0.14 | 0.007 (0.0001 - 0.014)  | 0.05     | 7809 | 0.28 |
| KCTD15 | rs11084753 | 19q13.11 | G  | 0.0004 (-0.004 - 0.005) | 0.86     | 22748 | 0.67      | 0.007 (-0.004 - 0.018)    | 0.24    | 2767              | 0.66 | 0.002 (-0.005 - 0.008)  | 0.61     | 7806 | 0.64 |

Supplementary Table 2: Continued

| Gene   | SNP        | Location | CA | East Asians             |          |      | Pacific Islanders |                         |         |     |      |
|--------|------------|----------|----|-------------------------|----------|------|-------------------|-------------------------|---------|-----|------|
|        |            |          |    | Effect Size (95% CI)    | p-value  | N    | AF                | Effect Size (95% CI)    | p-value | N   | AF   |
| NEGR1  | rs2815752  | 1p31.1   | T  | -0.004 (-0.022 - 0.014) | 0.67     | 1902 | 0.93              | -0.003 (-0.046 - 0.04)  | 0.89    | 321 | 0.84 |
| TMEM18 | rs6548238  | 2p25.3   | C  | 0.001 (-0.014 - 0.017)  | 0.88     | 1902 | 0.90              | 0.002 (-0.057 - 0.06)   | 0.96    | 320 | 0.93 |
| GNPDA2 | rs10938397 | 4p12     | G  | -0.002 (-0.012 - 0.009) | 0.77     | 1897 | 0.29              | 0.046 (0.013 - 0.079)   | 0.01    | 321 | 0.27 |
| MTCH2  | rs10838738 | 11p11.2  | G  | 0.008 (-0.002 - 0.018)  | 0.10     | 1901 | 0.33              | 0.016 (-0.017 - 0.048)  | 0.34    | 321 | 0.31 |
| SH2B1  | rs7498665  | 16p11.2  | G  | 0.020 (0.006 - 0.034)   | 0.01     | 1899 | 0.14              | 0.019 (-0.015 - 0.052)  | 0.28    | 320 | 0.29 |
| FTO    | rs1121980  | 16q12.12 | A  | 0.005 (-0.022 - 0.033)  | 0.70     | 672  | 0.21              |                         |         |     |      |
| FTO    | rs3751812  | 16q12.12 | T  | 0.012 (-0.017 - 0.041)  | 0.43     | 701  | 0.18              |                         |         |     |      |
| FTO    | rs8050136  | 16q12.12 | A  | 0.018 (0.006 - 0.030)   | 2.31E-03 | 1930 | 0.20              | 0.017 (-0.017 - 0.051)  | 0.34    | 331 | 0.23 |
| FTO    | rs9930506  | 16q12.12 | G  | 0.009 (-0.017 - 0.034)  | 0.51     | 699  | 0.22              |                         |         |     |      |
| FTO    | rs9939609  | 16q12.12 | A  | 0.012 (-0.017 - 0.040)  | 0.42     | 696  | 0.18              |                         |         |     |      |
| MC4R   | rs12970134 | 18q22    | A  | 0.025 (-0.007 - 0.056)  | 0.12     | 696  | 0.16              |                         |         |     |      |
| MC4R   | rs17782313 | 18q22    | C  | 0.001 (-0.010 - 0.013)  | 0.82     | 1900 | 0.22              | -0.027 (-0.071 - 0.018) | 0.24    | 321 | 0.12 |
| KCTD15 | rs11084753 | 19q13.11 | G  | 0.001 (-0.009 - 0.01)   | 0.91     | 1902 | 0.30              | 0.024 (-0.007 - 0.055)  | 0.13    | 319 | 0.45 |

CA: coded allele; AF: risk allele frequency; CI: confidence interval

Supplementary Table 3: Meta-analysis of linear regression of putative obesity-related SNPs and natural log BMI, stratified by racial/ethnic group and unadjusted for ancestry principal components

| Gene   | SNP        | Location | CA | European Americans      |          |       | Hispanics |                         |         | African Americans |      |                         |          |      |      |
|--------|------------|----------|----|-------------------------|----------|-------|-----------|-------------------------|---------|-------------------|------|-------------------------|----------|------|------|
|        |            |          |    | Effect Size (95% CI)    | p-value  | N     | AF        | Effect Size (95% CI)    | p-value | N                 | AF   | Effect Size (95% CI)    | p-value  | N    | AF   |
| NEGR1  | rs2815752  | 1p31.1   | T  | 0.006 (0.002 - 0.01)    | 0.01     | 22774 | 0.62      | 0.001 (-0.011 - 0.013)  | 0.84    | 2767              | 0.71 | 0.0004 (-0.006 - 0.007) | 0.91     | 7807 | 0.54 |
| TMEM18 | rs6548238  | 2p25.3   | C  | 0.009 (0.003 - 0.014)   | 2.12E-03 | 22406 | 0.83      | 0.007 (-0.009 - 0.022)  | 0.41    | 2767              | 0.86 | 0.01 (-0.0005 - 0.019)  | 0.04     | 8541 | 0.88 |
| GNPDA2 | rs10938397 | 4p12     | G  | 0.005 (0.001 - 0.009)   | 0.02     | 22753 | 0.43      | 0.007 (-0.004 - 0.019)  | 0.20    | 2744              | 0.39 | 0.011 (0.003 - 0.018)   | 3.90E-03 | 8479 | 0.25 |
| MTCH2  | rs10838738 | 11p11.2  | G  | 0.005 (0.0004 - 0.009)  | 0.03     | 22784 | 0.35      | 0.006 (-0.005 - 0.018)  | 0.28    | 2769              | 0.36 | -0.005 (-0.015 - 0.005) | 0.33     | 8512 | 0.10 |
| SH2B1  | rs7498665  | 16p11.2  | G  | 0.002 (-0.002 - 0.006)  | 0.42     | 22749 | 0.38      | -0.009 (-0.020 - 0.002) | 0.12    | 2761              | 0.43 | 0.005 (-0.002 - 0.012)  | 0.14     | 8518 | 0.27 |
| FTO    | rs1121980  | 16q12.12 | A  | 0.015 (0.010 - 0.019)   | 1.84E-11 | 21426 | 0.43      | -0.003 (-0.053 - 0.048) | 0.91    | 426               | 0.37 | 0.005 (-0.004 - 0.014)  | 0.30     | 3545 | 0.47 |
| FTO    | rs3751812  | 16q12.12 | T  | 0.015 (0.011 - 0.019)   | 6.91E-12 | 21918 | 0.55      | 0.006 (-0.012 - 0.023)  | 0.53    | 1911              | 0.28 | 0.001 (-0.017 - 0.020)  | 0.89     | 3959 | 0.11 |
| FTO    | rs8050136  | 16q12.12 | A  | 0.015 (0.01 - 0.019)    | 4.80E-12 | 22788 | 0.41      | 0.014 (0.002 - 0.025)   | 0.02    | 2874              | 0.29 | 0.006 (-0.001 - 0.012)  | 0.08     | 8028 | 0.43 |
| FTO    | rs9930506  | 16q12.12 | G  | 0.014 (0.01 - 0.019)    | 5.96E-11 | 21783 | 0.44      | 0.010 (-0.007 - 0.028)  | 0.24    | 1912              | 0.32 | -0.0004 (-0.01 - 0.009) | 0.92     | 6610 | 0.21 |
| FTO    | rs9939609  | 16q12.12 | A  | 0.015 (0.011 - 0.019)   | 6.79E-12 | 21769 | 0.41      | -0.013 (-0.060 - 0.034) | 0.58    | 449               | 0.33 | 0.003 (-0.006 - 0.012)  | 0.48     | 3588 | 0.47 |
| MC4R   | rs12970134 | 18q22    | A  | 0.007 (0.002 - 0.012)   | 3.49E-03 | 21770 | 0.26      | -0.026 (-0.074 - 0.023) | 0.30    | 448               | 0.17 | 0.005 (-0.009 - 0.018)  | 0.47     | 3588 | 0.13 |
| MC4R   | rs17782313 | 18q22    | C  | 0.006 (0.001 - 0.011)   | 0.02     | 22736 | 0.23      | 0.001 (-0.014 - 0.016)  | 0.94    | 2769              | 0.14 | 0.008 (0.001 - 0.015)   | 0.04     | 7809 | 0.28 |
| KCTD15 | rs11084753 | 19q13.11 | G  | 0.0003 (-0.004 - 0.005) | 0.91     | 22748 | 0.67      | 0.007 (-0.005 - 0.018)  | 0.24    | 2767              | 0.66 | 0.001 (-0.005 - 0.008)  | 0.70     | 7806 | 0.64 |

Supplementary Table 3: Continued

| Gene   | SNP        | Location | CA | East Asians             |         |      | Pacific Islanders |                         |         |     |      |
|--------|------------|----------|----|-------------------------|---------|------|-------------------|-------------------------|---------|-----|------|
|        |            |          |    | Effect Size (95% CI)    | p-value | N    | AF                | Effect Size (95% CI)    | p-value | N   | AF   |
| NEGR1  | rs2815752  | 1p31.1   | T  | -0.005 (-0.023 - 0.014) | 0.62    | 1902 | 0.93              | 0.002 (-0.039 - 0.042)  | 0.94    | 321 | 0.84 |
| TMEM18 | rs6548238  | 2p25.3   | C  | 0.001 (-0.014 - 0.017)  | 0.86    | 1902 | 0.90              | 0.004 (-0.054 - 0.062)  | 0.89    | 320 | 0.93 |
| GNPDA2 | rs10938397 | 4p12     | G  | -0.002 (-0.011 - 0.008) | 0.77    | 1897 | 0.29              | 0.042 (0.009 - 0.074)   | 0.01    | 321 | 0.27 |
| MTCH2  | rs10838738 | 11p11.2  | G  | 0.009 (-0.001 - 0.018)  | 0.09    | 1901 | 0.33              | 0.015 (-0.017 - 0.047)  | 0.35    | 321 | 0.31 |
| SH2B1  | rs7498665  | 16p11.2  | G  | 0.020 (0.006 - 0.033)   | 0.01    | 1899 | 0.14              | 0.025 (-0.009 - 0.058)  | 0.15    | 320 | 0.29 |
| FTO    | rs1121980  | 16q12.12 | A  | 0.005 (-0.023 - 0.032)  | 0.73    | 672  | 0.21              |                         |         |     |      |
| FTO    | rs3751812  | 16q12.12 | T  | 0.011 (-0.018 - 0.039)  | 0.46    | 701  | 0.18              |                         |         |     |      |
| FTO    | rs8050136  | 16q12.12 | A  | 0.018 (0.007 - 0.030)   | 0.00    | 1930 | 0.20              | 0.014 (-0.019 - 0.048)  | 0.40    | 331 | 0.23 |
| FTO    | rs9930506  | 16q12.12 | G  | 0.008 (-0.017 - 0.033)  | 0.53    | 699  | 0.22              |                         |         |     |      |
| FTO    | rs9939609  | 16q12.12 | A  | 0.011 (-0.017 - 0.039)  | 0.45    | 696  | 0.18              |                         |         |     |      |
| MC4R   | rs12970134 | 18q22    | A  | 0.025 (-0.006 - 0.056)  | 0.11    | 696  | 0.16              |                         |         |     |      |
| MC4R   | rs17782313 | 18q22    | C  | 0.002 (-0.010 - 0.013)  | 0.80    | 1900 | 0.22              | -0.035 (-0.079 - 0.009) | 0.12    | 321 | 0.12 |
| KCTD15 | rs11084753 | 19q13.11 | G  | 0.001 (-0.009 - 0.011)  | 0.89    | 1902 | 0.30              | 0.019 (-0.011 - 0.049)  | 0.21    | 319 | 0.45 |

CA: coded allele; AF: risk allele frequency; CI: confidence interval

Supplemental Table 4: Meta-analysis of linear regression of putative obesity-related SNPs and natural log BMI, stratified by racial/ethnic group

| Gene   | SNP        | Location | CA | European Americans      |          |       |      | Hispanics                             |          |      |       | African Americans       |          |       |       |
|--------|------------|----------|----|-------------------------|----------|-------|------|---------------------------------------|----------|------|-------|-------------------------|----------|-------|-------|
|        |            |          |    | Effect Size (95% CI)    | p-value  | N     | AF   | Effect Size (95% CI)                  | p-value  | N    | AF    | Effect Size (95% CI)    | p-value  | N     | AF    |
| NEGR1  | rs2815752  | 1p31.1   | T  | 0.005 (0.001 - 0.008)   | 9.16E-03 | 28261 | 0.63 | -0.0001 (-0.011 - 0.011)              | 0.99     | 2891 | 0.71  | 0.001 (-0.004 - 0.006)  | 0.7      | 10576 | 0.54  |
| TMEM18 | rs6548238  | 2p25.3   | C  | 0.01 (0.006 - 0.014)    | 8.59E-08 | 37061 | 0.83 | 0.002 (-0.008 - 0.012)                | 0.7      | 6398 | 0.87  | 0.013 (0.006 - 0.02)    | 2.41E-04 | 14492 | 0.88  |
| GNPDA2 | rs10938397 | 4p12     | G  | 0.003 (0.0001 - 0.007)  | 0.04     | 31346 | 0.43 | 0.006 (-0.001 - 0.013)                | 0.11     | 6369 | 0.38  | 0.009 (0.003 - 0.014)   | 1.49E-03 | 14383 | 0.24  |
| MTCH2  | rs10838738 | 11p11.2  | G  | 0.005 (0.002 - 0.008)   | 1.01E-03 | 34679 | 0.35 | 0.008 (0.001 - 0.014)                 | 0.03     | 6406 | 0.37  | -0.006 (-0.014 - 0.002) | 0.15     | 13653 | 0.1   |
| SH2B1  | rs7498665  | 16p11.2  | G  | 0.002 (-0.001 - 0.006)  | 0.22     | 31383 | 0.38 | -0.0001 (-0.007 - 0.007) <sup>a</sup> | 0.98     | 6391 | 0.45  | 0.005 (-0.001 - 0.01)   | 0.09     | 13642 | 0.27  |
| FTO    | rs1121980  | 16q12.12 | A  | 0.015 (0.01 - 0.019)    | 7.60E-12 | 21645 | 0.43 | -0.003 (-0.053 - 0.048)               | 0.91     | 426  | 0.37  | 0.004 (-0.005 - 0.012)  | 0.38     | 4005  | 0.47  |
| FTO    | rs3751812  | 16q12.12 | T  | 0.014 (0.01 - 0.018)    | 4.21E-14 | 25776 | 0.52 | 0.006 (-0.012 - 0.023)                | 0.53     | 1911 | 0.275 | 0.004 (-0.011 - 0.02)   | 0.6      | 4549  | 0.118 |
| FTO    | rs8050136  | 16q12.12 | A  | 0.014 (0.01 - 0.017)    | 2.78E-14 | 26544 | 0.41 | 0.013 (0.003 - 0.023)                 | 9.91E-03 | 3674 | 0.29  | 0.006 (-0.0002 - 0.011) | 0.06     | 9435  | 0.43  |
| FTO    | rs9930506  | 16q12.12 | G  | 0.014 (0.01 - 0.019)    | 3.27E-11 | 21998 | 0.44 | 0.01 (-0.007 - 0.028)                 | 0.24     | 1912 | 0.32  | 0.0001 (-0.009 - 0.009) | 0.97     | 7065  | 0.21  |
| FTO    | rs9939609  | 16q12.12 | A  | 0.013 (0.01 - 0.017)    | 4.61E-15 | 28286 | 0.4  | -0.013 (-0.06 - 0.034)                | 0.58     | 449  | 0.33  | 0.001 (-0.005 - 0.008)  | 0.7      | 6492  | 0.47  |
| MC4R   | rs12970134 | 18q22    | A  | 0.008 (0.003 - 0.012)   | 1.31E-03 | 21987 | 0.26 | -0.026 (-0.074 - 0.023)               | 0.3      | 448  | 0.17  | 0.006 (-0.007 - 0.018)  | 0.38     | 4046  | 0.13  |
| MC4R   | rs17782313 | 18q22    | C  | 0.002 (-0.0001 - 0.005) | 0.08     | 35398 | 0.22 | 0.004 (-0.006 - 0.013)                | 0.41     | 6388 | 0.13  | 0.006 (0.0002 - 0.011)  | 0.04     | 13698 | 0.29  |
| KCTD15 | rs11084753 | 19q13.11 | G  | 0.001 (-0.002 - 0.004)  | 0.61     | 29411 | 0.67 | 0.007 (-0.003 - 0.018)                | 0.18     | 2891 | 0.65  | 0.001 (-0.004 - 0.006)  | 0.72     | 10795 | 0.64  |

STable 4: Continued

| Gene   | SNP        | Location | CA | East Asians                         |          |      |      | Pacific Islanders       |         |     |      | American Indians        |          |      |      |
|--------|------------|----------|----|-------------------------------------|----------|------|------|-------------------------|---------|-----|------|-------------------------|----------|------|------|
|        |            |          |    | Effect Size (95% CI)                | p-value  | N    | AF   | Effect Size (95% CI)    | p-value | N   | AF   | Effect Size (95% CI)    | p-value  | N    | AF   |
| NEGR1  | rs2815752  | 1p31.1   | T  | -0.007 (-0.023 - 0.01)              | 0.43     | 2041 | 0.91 | -0.004 (-0.038 - 0.031) | 0.84    | 392 | 0.81 | -0.004 (-0.013 - 0.005) | 0.39     | 6153 | 0.76 |
| TMEM18 | rs6548238  | 2p25.3   | C  | -0.001 (-0.015 - 0.014)             | 0.94     | 2041 | 0.9  | 0.014 (-0.035 - 0.064)  | 0.57    | 392 | 0.92 | 0.002 (-0.007 - 0.011)  | 0.61     | 6186 | 0.78 |
| GNPDA2 | rs10938397 | 4p12     | G  | -0.001 (-0.01 - 0.009)              | 0.92     | 2037 | 0.28 | 0.02 (-0.008 - 0.047)   | 0.16    | 392 | 0.27 | 0.01 (0.001 - 0.018)    | 0.03     | 6125 | 0.24 |
| MTCH2  | rs10838738 | 11p11.2  | G  | 0.007 (-0.003 - 0.016) <sup>b</sup> | 0.16     | 2041 | 0.34 | 0.024 (-0.005 - 0.053)  | 0.11    | 392 | 0.34 | -0.004 (-0.011 - 0.003) | 0.25     | 6147 | 0.46 |
| SH2B1  | rs7498665  | 16p11.2  | G  | 0.019 (0.005 - 0.032)               | 5.77E-03 | 2038 | 0.13 | 0.028 (-0.001 - 0.056)  | 0.06    | 392 | 0.25 | 0.012 (0.004 - 0.02)    | 2.00E-03 | 6149 | 0.59 |
| FTO    | rs1121980  | 16q12.12 | A  | 0.005 (-0.023 - 0.032)              | 0.73     | 672  | 0.21 |                         |         |     |      |                         |          |      |      |
| FTO    | rs3751812  | 16q12.12 | T  | 0.011 (-0.018 - 0.039)              | 0.46     | 701  | 0.18 |                         |         |     |      |                         |          |      |      |
| FTO    | rs8050136  | 16q12.12 | A  | 0.016 (0.005 - 0.026)               | 3.14E-03 | 2325 | 0.19 | 0.017 (-0.008 - 0.042)  | 0.18    | 574 | 0.24 | 0.01 (-0.0004 - 0.021)  | 0.06     | 6193 | 0.13 |
| FTO    | rs9930506  | 16q12.12 | G  | 0.008 (-0.017 - 0.033)              | 0.53     | 699  | 0.22 |                         |         |     |      |                         |          |      |      |
| FTO    | rs9939609  | 16q12.12 | A  | 0.011 (-0.017 - 0.039)              | 0.45     | 696  | 0.18 |                         |         |     |      | 0.011 (0.00002 - 0.022) | 0.05     | 6168 | 0.14 |
| MC4R   | rs12970134 | 18q22    | A  | 0.025 (-0.006 - 0.056)              | 0.11     | 696  | 0.16 |                         |         |     |      |                         |          |      |      |
| MC4R   | rs17782313 | 18q22    | C  | 0.004 (-0.007 - 0.015)              | 0.46     | 2040 | 0.22 | -0.024 (-0.065 - 0.016) | 0.24    | 392 | 0.14 | 0.01 (-0.006 - 0.027)   | 0.21     | 6163 | 0.07 |
| KCTD15 | rs11084753 | 19q13.11 | G  | 0.008 (-0.002 - 0.018)              | 0.1      | 2041 | 0.62 | -0.001 (-0.03 - 0.027)  | 0.93    | 392 | 0.52 | 0.001 (-0.007 - 0.008)  | 0.89     | 6163 | 0.69 |

CA: coded allele; AF: risk allele frequency; CI: confidence interval;<sup>a</sup> = heterogeneity I<sup>2</sup> = 72.5, p-value = 0.03; <sup>b</sup> = heterogeneity I<sup>2</sup> = 87.2, p-value = 0.005

**Supplementary Table 5: Meta-analysis results for 7 SNPs not reaching genome-wide significance in prior GWAS of BMI and obesity***Supplementary Table 5a: Meta-analysis of linear regression of putative obesity-related SNPs and natural log BMI, stratified by racial/ethnic group*

| Gene            | SNP        | Location | CA | European Americans      |         |       |      | Hispanics               |         |      |      | African Americans       |         |      |      |
|-----------------|------------|----------|----|-------------------------|---------|-------|------|-------------------------|---------|------|------|-------------------------|---------|------|------|
|                 |            |          |    | Effect Size (95% CI)    | p-value | N     | AF   | Effect Size (95% CI)    | p-value | N    | AF   | Effect Size (95% CI)    | p-value | N    | AF   |
| INSIG2          | rs7566605  | 2q14.2   | G  | 0.0003 (-0.004 - 0.004) | 0.9     | 27929 | 0.67 | 0.008 (-0.001 - 0.017)  | 0.07    | 3950 | 0.72 | 0.001 (-0.007 - 0.008)  | 0.83    | 6935 | 0.75 |
| none identified | rs748192   | chr3     | A  | 0 (-0.006 - 0.006)      | 0.99    | 21775 | 0.17 | 0.028 (-0.031 - 0.086)  | 0.35    | 435  | 0.21 | -0.013 (-0.028 - 0.002) | 0.09    | 4030 | 0.09 |
| none identified | rs10498767 | chr6     | C  | 0.001 (-0.003 - 0.005)  | 0.62    | 21998 | 0.48 | 0.011 (-0.031 - 0.054)  | 0.6     | 449  | 0.55 | -0.005 (-0.014 - 0.004) | 0.31    | 4049 | 0.61 |
| none identified | rs1106683  | 7q32.3   | A  | 0.0002 (-0.006 - 0.006) | 0.96    | 22124 | 0.14 | -0.014 (-0.045 - 0.017) | 0.38    | 1913 | 0.09 | -0.005 (-0.015 - 0.005) | 0.31    | 7096 | 0.16 |
| PFKP            | rs6602024  | 10p15.2  | A  | 0.003 (-0.003 - 0.01)   | 0.35    | 21727 | 0.11 | 0.027 (-0.028 - 0.082)  | 0.34    | 449  | 0.12 | 0.001 (-0.008 - 0.01)   | 0.83    | 3961 | 0.28 |
| none identified | rs1333026  | 13q21.32 | A  | 0.006 (-0.002 - 0.014)  | 0.15    | 16148 | 0.14 | 0.003 (-0.023 - 0.029)  | 0.82    | 1912 | 0.11 | -0.005 (-0.017 - 0.006) | 0.36    | 4550 | 0.25 |
| CTNNBL1         | rs6013029  | 20q11.23 | T  | 0.007 (-0.003 - 0.016)  | 0.15    | 22124 | 0.06 | 0.007 (-0.026 - 0.041)  | 0.66    | 1913 | 0.07 | 0.008 (0.0001 - 0.016)  | 0.05    | 7079 | 0.27 |

  

| Gene            | SNP        | Location | CA | East Asians              |         |     |      |
|-----------------|------------|----------|----|--------------------------|---------|-----|------|
|                 |            |          |    | Effect Size (95% CI)     | p-value | N   | AF   |
| INSIG2          | rs7566605  | 2q14.2   | G  | -0.002 (-0.024 - 0.02)   | 0.88    | 695 | 0.65 |
| none identified | rs748192   | chr3     | A  | -0.006 (-0.033 - 0.021)  | 0.69    | 674 | 0.14 |
| none identified | rs10498767 | chr6     | C  | 0.001 (-0.02 - 0.021)    | 0.94    | 696 | 0.61 |
| none identified | rs1106683  | 7q32.3   | A  | 0.03 (-0.006 - 0.066)    | 0.1     | 702 | 0.09 |
| PFKP            | rs6602024  | 10p15.2  | A  | 0.046 (-0.033 - 0.125)   | 0.26    | 696 | 0.01 |
| none identified | rs1333026  | 13q21.32 | A  | -0.034 (-0.066 - -0.002) | 0.04    | 700 | 0.08 |
| CTNNBL1         | rs6013029  | 20q11.23 | T  | 0.051 (-0.059 - 0.16)    | 0.36    | 702 | 0.01 |

*Supplementary Table 5b: Meta-analysis of logistic regression of putative obesity-related SNPs and obesity, stratified by racial/ethnic group*

| Gene            | SNP        | Location | CA | European Americans    |         |       |      | Hispanics             |         |      |      | African Americans     |         |      |      |
|-----------------|------------|----------|----|-----------------------|---------|-------|------|-----------------------|---------|------|------|-----------------------|---------|------|------|
|                 |            |          |    | Effect Size (95% CI)  | p-value | N     | AF   | Effect Size (95% CI)  | p-value | N    | AF   | Effect Size (95% CI)  | p-value | N    | AF   |
| INSIG2          | rs7566605  | 2q14.2   | G  | 1.004 (0.957 - 1.055) | 0.85    | 27929 | 0.67 | 1.007 (0.902 - 1.125) | 0.90    | 3950 | 0.72 | 1.035 (0.952 - 1.125) | 0.41    | 6935 | 0.75 |
| none identified | rs748192   | chr3     | A  | 0.998 (0.926 - 1.075) | 0.95    | 21775 | 0.16 | 1.322 (0.818 - 2.136) | 0.25    | 435  | 0.21 | 0.840 (0.709 - 0.996) | 0.05    | 4030 | 0.09 |
| none identified | rs10498767 | chr6     | C  | 1.031 (0.976 - 1.089) | 0.27    | 21998 | 0.50 | 1.213 (0.848 - 1.735) | 0.29    | 449  | 0.55 | 0.958 (0.868 - 1.057) | 0.39    | 4049 | 0.61 |
| none identified | rs1106683  | 7q32.3   | A  | 0.961 (0.889 - 1.039) | 0.32    | 22124 | 0.14 | 0.916 (0.692 - 1.213) | 0.54    | 1913 | 0.09 | 0.937 (0.845 - 1.040) | 0.22    | 7096 | 0.16 |
| PFKP            | rs6602024  | 10p15.2  | A  | 1.030 (0.944 - 1.125) | 0.50    | 21727 | 0.11 | 1.265 (0.755 - 2.119) | 0.37    | 449  | 0.12 | 0.999 (0.898 - 1.111) | 0.98    | 3961 | 0.28 |
| none identified | rs1333026  | 13q21.32 | A  | 1.022 (0.923 - 1.131) | 0.68    | 16148 | 0.14 | 1.115 (0.862 - 1.441) | 0.41    | 1912 | 0.11 | 0.895 (0.793 - 1.010) | 0.07    | 4550 | 0.25 |
| CTNNBL1         | rs6013029  | 20q11.23 | T  | 1.022 (0.908 - 1.151) | 0.72    | 22124 | 0.05 | 1.029 (0.742 - 1.427) | 0.86    | 1913 | 0.07 | 1.045 (0.958 - 1.140) | 0.32    | 7079 | 0.27 |

  

| Gene            | SNP        | Location | CA | East Asians           |         |     |      |
|-----------------|------------|----------|----|-----------------------|---------|-----|------|
|                 |            |          |    | Effect Size (95% CI)  | p-value | N   | AF   |
| INSIG2          | rs7566605  | 2q14.2   | G  | 0.795 (0.496 - 1.276) | 0.34    | 695 | 0.65 |
| none identified | rs748192   | chr3     | A  | 1.044 (0.579 - 1.883) | 0.89    | 674 | 0.14 |
| none identified | rs10498767 | chr6     | C  | 0.935 (0.593 - 1.474) | 0.77    | 696 | 0.61 |
| none identified | rs1106683  | 7q32.3   | A  | 1.400 (0.720 - 2.722) | 0.32    | 702 | 0.09 |
| PFKP            | rs6602024  | 10p15.2  | A  | 0.373 (0.092 - 1.509) | 0.17    | 696 | 0.01 |
| none identified | rs1333026  | 13q21.32 | A  | 0.664 (0.256 - 1.722) | 0.40    | 700 | 0.08 |
| CTNNBL1         | rs6013029  | 20q11.23 | T  | 1.270 (0.162 - 9.938) | 0.82    | 702 | 0.01 |

CA: coded allele; AF: risk allele frequency; CI: confidence interval

**Supplementary Table 6a: Meta-analysis of linear regression of putative obesity-related SNPs and natural log BMI, stratified by racial/ethnic group and adjusted for ancestry principal components**

| Gene            | SNP        | Location | CA | European Americans       |         |       | Hispanics |                         |         | African Americans |      |                         |         |      |      |
|-----------------|------------|----------|----|--------------------------|---------|-------|-----------|-------------------------|---------|-------------------|------|-------------------------|---------|------|------|
|                 |            |          |    | Effect Size (95% CI)     | p-value | N     | AF        | Effect Size (95% CI)    | p-value | N                 | AF   | Effect Size (95% CI)    | p-value | N    | AF   |
| INSIG2          | rs7566605  | 2q14.2   | G  | -0.0002 (-0.005 - 0.004) | 0.94    | 21659 | 0.67      | -0.01 (-0.057 - 0.037)  | 0.67    | 449               | 0.72 | 0.002 (-0.008 - 0.012)  | 0.68    | 3556 | 0.75 |
| none identified | rs748192   | chr3     | A  | -0.001 (-0.006 - 0.005)  | 0.84    | 21558 | 0.17      | 0.031 (-0.024 - 0.085)  | 0.27    | 435               | 0.21 | -0.012 (-0.028 - 0.005) | 0.17    | 3570 | 0.09 |
| none identified | rs10498767 | chr6     | C  | 0.001 (-0.003 - 0.005)   | 0.70    | 21779 | 0.48      | 0.008 (-0.035 - 0.051)  | 0.72    | 449               | 0.55 | -0.004 (-0.014 - 0.005) | 0.39    | 3590 | 0.61 |
| none identified | rs1106683  | 7q32.3   | A  | 0.001 (-0.005 - 0.007)   | 0.80    | 21906 | 0.14      | -0.011 (-0.041 - 0.020) | 0.48    | 1913              | 0.09 | -0.006 (-0.017 - 0.004) | 0.23    | 6636 | 0.16 |
| PFKP            | rs6602024  | 10p15.2  | A  | 0.001 (-0.005 - 0.008)   | 0.71    | 21518 | 0.11      | 0.024 (-0.026 - 0.074)  | 0.35    | 449               | 0.12 | -0.002 (-0.012 - 0.008) | 0.71    | 3523 | 0.28 |
| none identified | rs1333026  | 13q21.32 | A  | 0.004 (-0.009 - 0.017)   | 0.53    | 12857 | 0.15      | 0.005 (-0.021 - 0.031)  | 0.68    | 1912              | 0.11 | -0.007 (-0.021 - 0.006) | 0.29    | 3959 | 0.25 |
| CTNBL1          | rs6013029  | 20q11.23 | T  | 0.007 (-0.002 - 0.016)   | 0.15    | 21905 | 0.06      | 0.009 (-0.024 - 0.043)  | 0.59    | 1913              | 0.07 | 0.006 (-0.002 - 0.015)  | 0.15    | 6620 | 0.27 |

| Gene            | SNP        | Location | CA | East Asians               |         |     |      |
|-----------------|------------|----------|----|---------------------------|---------|-----|------|
|                 |            |          |    | Effect Size (95% CI)      | p-value | N   | AF   |
| INSIG2          | rs7566605  | 2q14.2   | G  | -0.002 (-0.024 - 0.021)   | 0.88    | 695 | 0.65 |
| none identified | rs748192   | chr3     | A  | -0.006 (-0.033 - 0.021)   | 0.67    | 674 | 0.14 |
| none identified | rs10498767 | chr6     | C  | 0.001 (-0.019 - 0.021)    | 0.92    | 696 | 0.61 |
| none identified | rs1106683  | 7q32.3   | A  | 0.031 (-0.005 - 0.067)    | 0.09    | 702 | 0.09 |
| PFKP            | rs6602024  | 10p15.2  | A  | 0.046 (-0.035 - 0.127)    | 0.26    | 696 | 0.01 |
| none identified | rs1333026  | 13q21.32 | A  | -0.033 (-0.066 - -0.0005) | 0.05    | 700 | 0.08 |
| CTNBL1          | rs6013029  | 20q11.23 | T  | 0.049 (-0.062 - 0.161)    | 0.39    | 702 | 0.01 |

**Supplementary Table 6b: Meta-analysis of linear regression of putative obesity-related SNPs and natural log BMI, stratified by racial/ethnic group and unadjusted for ancestry principal components**

| Gene            | SNP        | Location | CA | European Americans       |         |       | Hispanics |                         |         | African Americans |      |                         |         |      |      |
|-----------------|------------|----------|----|--------------------------|---------|-------|-----------|-------------------------|---------|-------------------|------|-------------------------|---------|------|------|
|                 |            |          |    | Effect Size (95% CI)     | p-value | N     | AF        | Effect Size (95% CI)    | p-value | N                 | AF   | Effect Size (95% CI)    | p-value | N    | AF   |
| INSIG2          | rs7566605  | 2q14.2   | G  | -0.0003 (-0.005 - 0.004) | 0.91    | 21659 | 0.67      | -0.009 (-0.057 - 0.039) | 0.72    | 449               | 0.72 | 0.003 (-0.007 - 0.013)  | 0.57    | 3556 | 0.75 |
| none identified | rs748192   | chr3     | A  | -0.001 (-0.006 - 0.005)  | 0.88    | 21558 | 0.17      | 0.028 (-0.031 - 0.086)  | 0.35    | 435               | 0.21 | -0.013 (-0.029 - 0.004) | 0.13    | 3570 | 0.09 |
| none identified | rs10498767 | chr6     | C  | 0.001 (-0.003 - 0.005)   | 0.67    | 21779 | 0.48      | 0.011 (-0.031 - 0.054)  | 0.60    | 449               | 0.55 | -0.004 (-0.013 - 0.006) | 0.46    | 3590 | 0.61 |
| none identified | rs1106683  | 7q32.3   | A  | 0.001 (-0.005 - 0.006)   | 0.87    | 21906 | 0.14      | -0.014 (-0.045 - 0.017) | 0.38    | 1913              | 0.09 | -0.006 (-0.016 - 0.004) | 0.26    | 6636 | 0.16 |
| PFKP            | rs6602024  | 10p15.2  | A  | 0.002 (-0.005 - 0.008)   | 0.65    | 21518 | 0.11      | 0.027 (-0.028 - 0.082)  | 0.34    | 449               | 0.12 | 0.0003 (-0.010 - 0.010) | 0.96    | 3523 | 0.28 |
| none identified | rs1333026  | 13q21.32 | A  | 0.005 (-0.009 - 0.018)   | 0.50    | 12857 | 0.15      | 0.003 (-0.023 - 0.029)  | 0.82    | 1912              | 0.11 | -0.006 (-0.020 - 0.008) | 0.39    | 3959 | 0.25 |
| CTNBL1          | rs6013029  | 20q11.23 | T  | 0.007 (-0.002 - 0.016)   | 0.14    | 21905 | 0.06      | 0.007 (-0.026 - 0.041)  | 0.66    | 1913              | 0.07 | 0.010 (0.001 - 0.018)   | 0.03    | 6620 | 0.27 |

| Gene            | SNP        | Location | CA | East Asians              |         |     |      |
|-----------------|------------|----------|----|--------------------------|---------|-----|------|
|                 |            |          |    | Effect Size (95% CI)     | p-value | N   | AF   |
| INSIG2          | rs7566605  | 2q14.2   | G  | -0.002 (-0.024 - 0.02)   | 0.88    | 695 | 0.65 |
| none identified | rs748192   | chr3     | A  | -0.006 (-0.033 - 0.021)  | 0.69    | 674 | 0.14 |
| none identified | rs10498767 | chr6     | C  | 0.001 (-0.020 - 0.021)   | 0.94    | 696 | 0.61 |
| none identified | rs1106683  | 7q32.3   | A  | 0.030 (-0.006 - 0.066)   | 0.10    | 702 | 0.09 |
| PFKP            | rs6602024  | 10p15.2  | A  | 0.046 (-0.033 - 0.125)   | 0.26    | 696 | 0.01 |
| none identified | rs1333026  | 13q21.32 | A  | -0.034 (-0.066 - -0.002) | 0.04    | 700 | 0.08 |
| CTNBL1          | rs6013029  | 20q11.23 | T  | 0.051 (-0.059 - 0.160)   | 0.36    | 702 | 0.01 |

CA: coded allele; AF: risk allele frequency; CI: confidence interval

Supplementary Table 7: Ranges of pairwise correlation ( $r^2$ ) for putative obesity-related SNPs in FTO and MC4R, stratified by racial/ethnic group. Based on WHI, EAGLE, ARIC, MEC, and CHS data

|                           | Gene | SNP        | rs1121980 | rs3751812   | rs8050136   | rs9930506   | rs9939609   | rs17782313  |
|---------------------------|------|------------|-----------|-------------|-------------|-------------|-------------|-------------|
| <u>European Americans</u> | FTO  | rs1121980  | 1         | 0.85 - 0.87 | 0.86 - 0.89 | 0.83 - 0.86 | 0.86 - 0.88 | na          |
|                           |      | rs3751812  |           | 1           | 0.94 - 0.99 | 0.86        | 0.96 - 0.99 | na          |
|                           |      | rs8050136  |           |             | 1           | 0.82 - 0.85 | 0.97 - 0.99 | na          |
|                           |      | rs9930506  |           |             |             | 1           | 0.83 - 0.85 | na          |
|                           |      | rs9939609  |           |             |             |             | 1           | na          |
|                           | MC4R | rs12970134 | na        | na          | na          | na          | na          | 0.76        |
| <u>Hispanics</u>          | FTO  | rs1121980  | 1         | 0.63        | 0.75        | 0.7         | 0.77        | na          |
|                           |      | rs3751812  |           | 1           | 0.84        | 0.78        | 0.76        | na          |
|                           |      | rs8050136  |           |             | 1           | 0.66        | 0.91        | na          |
|                           |      | rs9930506  |           |             |             | 1           | 0.66        | na          |
|                           |      | rs9939609  |           |             |             |             | 1           | na          |
|                           | MC4R | rs12970134 | na        | na          | na          | na          | na          | 0.57        |
| <u>African Americans</u>  | FTO  | rs1121980  | 1         | 0.15        | 0.73 - 0.76 | 0.18 - 0.20 | 0.59 - 0.62 | na          |
|                           |      | rs3751812  |           | 1           | 0.12 - 0.40 | 0.46        | 0.14 - 0.36 | na          |
|                           |      | rs8050136  |           |             | 1           | 0.09 - 0.12 | 0.84 - 0.92 | na          |
|                           |      | rs9930506  |           |             |             | 1           | 0.07 - 0.09 | na          |
|                           |      | rs9939609  |           |             |             |             | 1           | na          |
|                           | MC4R | rs12970134 | na        | na          | na          | na          | na          | 0.11 - 0.13 |
| <u>East Asians</u>        | FTO  | rs1121980  | 1         | 0.81        | 0.81        | 0.9         | 0.81        | na          |
|                           |      | rs3751812  |           | 1           | 0.99        | 0.77        | 0.99        | na          |
|                           |      | rs8050136  |           |             | 1           | 0.77        | 0.98        | na          |
|                           |      | rs9930506  |           |             |             | 1           | 0.75        | na          |
|                           |      | rs9939609  |           |             |             |             | 1           | na          |
|                           | MC4R | rs12970134 | na        | na          | na          | na          | na          | 0.64        |
| <u>American Indians</u>   | Gene | SNP        | rs9939609 |             |             |             |             |             |
|                           | FTO  | rs8050136  | 0.98      |             |             |             |             |             |



Supplemental Table 8: PAGE site-specific linear regression of putative obesity-related SNPs and natural log BMI, using a range of BMI exclusion criteria

**European Americans, ARIC**

| Gene   | SNP        | Location | CA | BMI 18.5 - 40 only      |            |       | BMI 18.5 - 50 only      |            |       | BMI 18.5 - 70 only      |            |       |
|--------|------------|----------|----|-------------------------|------------|-------|-------------------------|------------|-------|-------------------------|------------|-------|
|        |            |          |    | Effect Size (95% CI)    | p-value    | N     | Effect Size (95% CI)    | p-value    | N     | Effect Size (95% CI)    | p-value    | N     |
| NEGR1  | rs2815752  | 1p31.1   | T  | 0.005 (0.001 - 0.01)    | 0.02       | 9092  | 0.007 (0.002 - 0.012)   | 0.01       | 9243  | 0.007 (0.002 - 0.012)   | 0.004      | 9256  |
| TMEM18 | rs6548238  | 2p25.3   | C  | 0.006 (0.0002 - 0.011)  | 0.04       | 10617 | 0.007 (0.001 - 0.013)   | 0.02       | 10795 | 0.008 (0.002 - 0.014)   | 0.01       | 10810 |
| GNPDA2 | rs10938397 | 4p12     | G  | 0.01 (0.001 - 0.019)    | 0.02       | 2126  | 0.01 (0.0004 - 0.019)   | 0.04       | 2166  | 0.009 (-0.0002 - 0.019) | 0.05       | 2168  |
| MTCH2  | rs10838738 | 11p11.2  | G  | -0.003 (-0.013 - 0.006) | 0.46       | 2128  | -0.002 (-0.012 - 0.008) | 0.66       | 2168  | -0.001 (-0.011 - 0.009) | 0.81       | 2170  |
| SH2B1  | rs7498665  | 16p11.2  | G  | 0.002 (-0.007 - 0.012)  | 0.61       | 2122  | 0.004 (-0.006 - 0.014)  | 0.47       | 2161  | 0.004 (-0.006 - 0.014)  | 0.44       | 2163  |
| FTO    | rs1121980  | 16q12.12 | A  |                         |            |       |                         |            |       |                         |            |       |
| FTO    | rs3751812  | 16q12.12 | T  |                         |            |       |                         |            |       |                         |            |       |
| FTO    | rs8050136  | 16q12.12 | A  | 0.016 (0.011 - 0.02)    | 5.6E-12    | 9092  | 0.017 (0.012 - 0.022)   | 5.9192E-12 | 9243  | 0.017 (0.013 - 0.022)   | 2.4095E-12 | 9256  |
| FTO    | rs9930506  | 16q12.12 | G  |                         |            |       |                         |            |       |                         |            |       |
| FTO    | rs9939609  | 16q12.12 | A  | 0.016 (0.012 - 0.021)   | 3.9489E-12 | 9082  | 0.017 (0.012 - 0.022)   | 4.9931E-12 | 9233  | 0.017 (0.013 - 0.022)   | 2.0512E-12 | 9246  |
| MC4R   | rs12970134 | 18q22    | A  |                         |            |       |                         |            |       |                         |            |       |
| MC4R   | rs17782313 | 18q22    | C  | 0.005 (-0.0001 - 0.011) | 0.05       | 9088  | 0.007 (0.002 - 0.013)   | 0.01       | 9239  | 0.007 (0.001 - 0.013)   | 0.02       | 9252  |
| KCTD15 | rs11084753 | 19q13.11 | G  | 0.002 (-0.002 - 0.007)  | 0.34       | 9070  | 0.002 (-0.003 - 0.007)  | 0.49       | 9221  | 0.001 (-0.004 - 0.007)  | 0.60       | 9234  |

**African Americans, ARIC**

| Gene   | SNP        | Location | CA | BMI 18.5 - 40 only      |         |      | BMI 18.5 - 50 only       |         |      | BMI 18.5 - 70 only       |         |      |
|--------|------------|----------|----|-------------------------|---------|------|--------------------------|---------|------|--------------------------|---------|------|
|        |            |          |    | Effect Size (95% CI)    | p-value | N    | Effect Size (95% CI)     | p-value | N    | Effect Size (95% CI)     | p-value | N    |
| NEGR1  | rs2815752  | 1p31.1   | T  | -0.004 (-0.012 - 0.004) | 0.28    | 2949 | -0.003 (-0.011 - 0.006)  | 0.56    | 3105 | -0.003 (-0.012 - 0.006)  | 0.52    | 3134 |
| TMEM18 | rs6548238  | 2p25.3   | C  | 0.003 (-0.008 - 0.015)  | 0.54    | 3664 | 0.003 (-0.01 - 0.015)    | 0.65    | 3869 | 0.006 (-0.007 - 0.018)   | 0.40    | 3897 |
| GNPDA2 | rs10938397 | 4p12     | G  | 0.002 (-0.006 - 0.011)  | 0.58    | 3626 | 0.004 (-0.006 - 0.013)   | 0.44    | 3827 | 0.003 (-0.006 - 0.013)   | 0.50    | 3855 |
| MTCH2  | rs10838738 | 11p11.2  | G  | -0.002 (-0.014 - 0.011) | 0.77    | 3626 | -0.005 (-0.018 - 0.009)  | 0.49    | 3830 | -0.0004 (-0.014 - 0.014) | 0.96    | 3858 |
| SH2B1  | rs7498665  | 16p11.2  | G  | 0.003 (-0.005 - 0.011)  | 0.41    | 3639 | 0.005 (-0.004 - 0.014)   | 0.25    | 3840 | 0.006 (-0.003 - 0.015)   | 0.20    | 3868 |
| FTO    | rs1121980  | 16q12.12 | A  |                         |         |      |                          |         |      |                          |         |      |
| FTO    | rs3751812  | 16q12.12 | T  |                         |         |      |                          |         |      |                          |         |      |
| FTO    | rs8050136  | 16q12.12 | A  | 0.008 (0.0001 - 0.016)  | 0.05    | 2949 | 0.008 (-0.0003 - 0.017)  | 0.06    | 3105 | 0.006 (-0.003 - 0.015)   | 0.22    | 3134 |
| FTO    | rs9930506  | 16q12.12 | G  |                         |         |      |                          |         |      |                          |         |      |
| FTO    | rs9939609  | 16q12.12 | A  | 0.008 (0.001 - 0.016)   | 0.04    | 2949 | 0.01 (0.001 - 0.019)     | 0.03    | 3105 | 0.007 (-0.002 - 0.016)   | 0.13    | 3134 |
| MC4R   | rs12970134 | 18q22    | A  |                         |         |      |                          |         |      |                          |         |      |
| MC4R   | rs17782313 | 18q22    | C  | 0.002 (-0.007 - 0.011)  | 0.66    | 2946 | 0.004 (-0.006 - 0.014)   | 0.40    | 3102 | 0.004 (-0.006 - 0.014)   | 0.43    | 3131 |
| KCTD15 | rs11084753 | 19q13.11 | G  | 0.0002 (-0.008 - 0.009) | 0.96    | 2944 | -0.0003 (-0.009 - 0.009) | 0.94    | 3100 | -0.003 (-0.013 - 0.006)  | 0.52    | 3129 |

Supplemental Table 8: Continued

| European Americans, WHI |            |          |    | BMI 18.5 - 40 only     |         |       | BMI 18.5 - 50 only      |         |       | BMI 18.5 - 70 only      |         |       |
|-------------------------|------------|----------|----|------------------------|---------|-------|-------------------------|---------|-------|-------------------------|---------|-------|
| Gene                    | SNP        | Location | CA | Effect Size (95% CI)   | p-value | N     | Effect Size (95% CI)    | p-value | N     | Effect Size (95% CI)    | p-value | N     |
| NEGR1                   | rs2815752  | 1p31.1   | T  | 0.002 (-0.006 - 0.01)  | 0.64    | 11894 | 0.001 (-0.008 - 0.01)   | 0.82    | 12752 | 0.002 (-0.007 - 0.011)  | 0.71    | 12871 |
| TMEM18                  | rs6548238  | 2p25.3   | C  | 0.005 (-0.005 - 0.015) | 0.32    | 11896 | 0.007 (-0.005 - 0.018)  | 0.26    | 12754 | 0.005 (-0.007 - 0.017)  | 0.41    | 12873 |
| GNPDA2                  | rs10938397 | 4p12     | G  | 0.002 (-0.006 - 0.009) | 0.69    | 11875 | 0.007 (-0.002 - 0.015)  | 0.12    | 12727 | 0.005 (-0.004 - 0.014)  | 0.24    | 12846 |
| MTCH2                   | rs10838738 | 11p11.2  | G  | 0.003 (-0.005 - 0.011) | 0.50    | 11896 | 0.0003 (-0.009 - 0.01)  | 0.94    | 12754 | -0.001 (-0.011 - 0.008) | 0.81    | 12873 |
| SH2B1                   | rs7498665  | 16p11.2  | G  | 0.009 (0.001 - 0.016)  | 0.03    | 11863 | 0.009 (-0.0002 - 0.017) | 0.06    | 12719 | 0.009 (-0.001 - 0.018)  | 0.07    | 12838 |
| FTO                     | rs1121980  | 16q12.12 | A  | 0.007 (-0.001 - 0.015) | 0.08    | 11450 | 0.01 (0.001 - 0.02)     | 0.03    | 12273 | 0.009 (-0.0004 - 0.018) | 0.06    | 12388 |
| FTO                     | rs3751812  | 16q12.12 | T  | 0.006 (-0.002 - 0.014) | 0.13    | 11896 | 0.01 (0.001 - 0.019)    | 0.03    | 12752 | 0.008 (-0.001 - 0.018)  | 0.07    | 12871 |
| FTO                     | rs8050136  | 16q12.12 | A  | 0.006 (-0.002 - 0.014) | 0.14    | 11896 | 0.009 (0.0003 - 0.018)  | 0.04    | 12754 | 0.008 (-0.001 - 0.017)  | 0.09    | 12873 |
| FTO                     | rs9930506  | 16q12.12 | G  | 0.007 (-0.001 - 0.015) | 0.08    | 11842 | 0.01 (0.001 - 0.019)    | 0.03    | 12699 | 0.009 (-0.001 - 0.018)  | 0.07    | 12817 |
| FTO                     | rs9939609  | 16q12.12 | A  | 0.006 (-0.002 - 0.014) | 0.15    | 11774 | 0.009 (0.0003 - 0.019)  | 0.04    | 12622 | 0.008 (-0.001 - 0.017)  | 0.09    | 12741 |
| MC4R                    | rs12970134 | 18q22    | A  | 0.007 (-0.002 - 0.015) | 0.13    | 11773 | 0.006 (-0.003 - 0.016)  | 0.18    | 12621 | 0.003 (-0.006 - 0.013)  | 0.50    | 12740 |
| MC4R                    | rs17782313 | 18q22    | C  | 0.01 (0.001 - 0.019)   | 0.03    | 11865 | 0.01 (-0.00003 - 0.02)  | 0.05    | 12720 | 0.007 (-0.003 - 0.017)  | 0.18    | 12839 |
| KCTD15                  | rs11084753 | 19q13.11 | G  | 0.005 (-0.003 - 0.013) | 0.21    | 11893 | 0.006 (-0.003 - 0.015)  | 0.19    | 12751 | 0.007 (-0.002 - 0.017)  | 0.13    | 12870 |

## African Americans, WHI

| African Americans, WHI |            |          |    | BMI 18.5 - 40 only      |         |      | BMI 18.5 - 50 only       |         |      | BMI 18.5 - 70 only      |         |      |
|------------------------|------------|----------|----|-------------------------|---------|------|--------------------------|---------|------|-------------------------|---------|------|
| Gene                   | SNP        | Location | CA | Effect Size (95% CI)    | p-value | N    | Effect Size (95% CI)     | p-value | N    | Effect Size (95% CI)    | p-value | N    |
| NEGR1                  | rs2815752  | 1p31.1   | T  | -0.001 (-0.011 - 0.009) | 0.84    | 3143 | -0.0004 (-0.012 - 0.011) | 0.94    | 3847 | 0.002 (-0.009 - 0.014)  | 0.67    | 3956 |
| TMEM18                 | rs6548238  | 2p25.3   | C  | 0.015 (0.001 - 0.03)    | 0.04    | 3146 | 0.023 (0.007 - 0.039)    | 0.005   | 3851 | 0.021 (0.004 - 0.038)   | 0.02    | 3960 |
| GNPDA2                 | rs10938397 | 4p12     | G  | 0.012 (0.001 - 0.024)   | 0.03    | 3124 | 0.017 (0.005 - 0.03)     | 0.01    | 3825 | 0.02 (0.006 - 0.033)    | 0.004   | 3934 |
| MTCH2                  | rs10838738 | 11p11.2  | G  | 0.001 (-0.015 - 0.016)  | 0.94    | 3147 | -0.001 (-0.018 - 0.016)  | 0.90    | 3852 | 0.004 (-0.015 - 0.022)  | 0.71    | 3961 |
| SH2B1                  | rs7498665  | 16p11.2  | G  | 0.002 (-0.009 - 0.014)  | 0.69    | 3141 | 0.005 (-0.007 - 0.018)   | 0.41    | 3845 | 0.007 (-0.006 - 0.02)   | 0.28    | 3954 |
| FTO                    | rs1121980  | 16q12.12 | A  | -0.022 (-0.044 - 0.001) | 0.06    | 687  | -0.015 (-0.039 - 0.009)  | 0.22    | 848  | -0.017 (-0.042 - 0.007) | 0.17    | 870  |
| FTO                    | rs3751812  | 16q12.12 | T  | 0.004 (-0.013 - 0.02)   | 0.67    | 3145 | 0.012 (-0.006 - 0.031)   | 0.19    | 3850 | 0.013 (-0.007 - 0.032)  | 0.20    | 3959 |
| FTO                    | rs8050136  | 16q12.12 | A  | 0.0001 (-0.01 - 0.011)  | 0.98    | 3146 | 0.002 (-0.009 - 0.014)   | 0.69    | 3851 | 0.002 (-0.01 - 0.014)   | 0.72    | 3960 |
| FTO                    | rs9930506  | 16q12.12 | G  | 0.002 (-0.011 - 0.014)  | 0.79    | 3144 | 0.008 (-0.006 - 0.021)   | 0.27    | 3847 | 0.009 (-0.005 - 0.023)  | 0.21    | 3956 |
| FTO                    | rs9939609  | 16q12.12 | A  | -0.013 (-0.035 - 0.009) | 0.24    | 724  | -0.015 (-0.038 - 0.009)  | 0.22    | 888  | -0.015 (-0.039 - 0.009) | 0.21    | 914  |
| MC4R                   | rs12970134 | 18q22    | A  | -0.001 (-0.032 - 0.029) | 0.94    | 724  | 0.016 (-0.018 - 0.05)    | 0.36    | 889  | 0.012 (-0.023 - 0.047)  | 0.49    | 915  |
| MC4R                   | rs17782313 | 18q22    | C  | 0.004 (-0.007 - 0.015)  | 0.50    | 3144 | 0.006 (-0.006 - 0.019)   | 0.30    | 3849 | 0.009 (-0.004 - 0.022)  | 0.17    | 3957 |
| KCTD15                 | rs11084753 | 19q13.11 | G  | -0.002 (-0.012 - 0.009) | 0.75    | 3146 | -0.007 (-0.019 - 0.004)  | 0.21    | 3851 | -0.008 (-0.02 - 0.004)  | 0.18    | 3959 |

CA: coded allele; AF: risk allele frequency; CI: confidence interval

**Title:** Influence of population diversity on replication of obesity-related GWAS findings: The PAGE Consortium.

## **Supplementary Methods**

### *PAGE Cohort Descriptions*

Causal Variants Across the Life Course (CALiCo): CALiCo is a consortium of well characterized population based studies and a central genotyping and resequencing core laboratory. This collaborative network includes six of the most informative and demographically diverse population-based studies extant, contributing approximately 58,000 men and women from the main ethnic and racial groups in the U.S., ranging in age from childhood to old adulthood. Four CALiCo studies are involved in this analysis: Atherosclerosis Risk in Communities Study (ARIC), Coronary Artery Risk in Young Adults (CARDIA), Cardiovascular Health Study (CHS), and Strong Heart Family Study (SHFS) and Strong Heart Cohort Study (SHCS).

ARIC is a multi-center prospective investigation of atherosclerotic disease in a predominantly bi-racial population conducted in four U.S. communities, involving both cohort and community surveillance components[1]. European American and African American men and women aged 45-64 years at baseline were recruited from 4 communities: Forsyth County, North Carolina; Jackson, Mississippi; suburban areas of Minneapolis, Minnesota; and Washington County, Maryland. A total of 15,792 individuals participated in the baseline examination in 1987-1989, with follow-up examinations in approximate 3-year intervals, during 1990-1992, 1993-1995, and 1996-1998. Weight and height were measured. Current smoking was dichotomized as yes/no according to the question "Do you now smoke cigarettes?"

CARDIA multicenter longitudinal study of the development and determinants of cardiovascular disease over time in 5115 young adults initially aged 18 to 30 years from 1985 to 1986 [2]. African American and European American adults were recruited from four US cities (Birmingham, Ala; Chicago, Ill; Minneapolis, Minn; and Oakland, Calif) with population-based samples approximately balanced within center by sex, age (18 to 24 or 25 to 30 years), Racial/ethnic group (European American or African American), and education (high school graduate or less or greater than high school graduate). Participants have been reexamined 2, 5, 7, 10, 15, and 20 years after baseline; and retention rates across examinations were 91%, 86%, 81%, 79%, 74%, and 72%, respectively.

The CHS is a prospective, population-based cohort study of cardiovascular disease in older adults[3]. In 1989/1990, a group of 5201 men and women 65 years of age and older was recruited from a random sample of Medicare-eligible residents in 4 US communities: Forsyth County, NC; Sacramento County, CA; Washington County, MD; and Allegheny County, PA. To be considered eligible, persons had to meet the following criteria: 1) age at least 65 years; 2) not institutionalized; 3) expected to remain in the current community for 3 years or longer; 4) not under active treatment for cancer; and 5) provided informed consent without requiring a proxy respondent. To increase the number of African American participants, a supplemental cohort of 687 predominantly African American men and women was recruited in 1992/1993 from three of the same communities (excepting Washington County) using the same sampling and recruitment methods. CHS participants completed standardized clinical examinations and questionnaires at study baselines and at up to 9 annual follow-up visits.

The SHCS is a community-based study of CVD and its risk factors among American Indians, supported by the National Heart, Lung, and Blood Institute (NHLBI) [4, 5]. The family component of the study (SHFS) began in 1998 (phase III) with a pilot study that recruited and examined at least 300 members of 9-2 extended families in each of the three centers (Arizona, South Dakota, Oklahoma). In phase IV of the

SHFS, an additional ~900 family members were recruited from each center yielding sample sizes of more than 1,200 participants at each site. In all centers, some individuals are descended from more than one tribe and/or from non-Indian ancestors.

The Women's Health Initiative (WHI) is a prospective cohort study investigating post-menopausal women's health in the U.S [6]. WHI was funded by the National Institutes of Health and the National Heart, Lung, and Blood Institute to study strategies to prevent heart disease, breast cancer, colon cancer, and osteoporotic fractures in women aged 50-79. WHI consists of two parts: randomized clinical trials of hormone therapy, dietary modification, and calcium/Vitamin D supplementation, and an observational cohort study. Subjects for this analysis are 21,000 women drawn from the pool of over 161,000 women involved in either the clinical trial or observational study components of WHI. The 21,000 women were chosen using several selection criteria, which resulted in oversampling women with a BMI > 40, and women belonging to non-white ancestry groups. All selected women were required to have DNA available for analysis.

The Multiethnic Cohort (MEC) is a population-based prospective cohort study of over 215,000 men and women in Hawaii and California aged 45-75 at baseline (1993-1996) and primarily of five ancestries[7]. The MEC was funded by the National Cancer Institute in 1993 to examine lifestyle risk factors and genetic susceptibility to cancer. Cohort members who develop cancer are identified via the California and Hawaii state cancer registries, and all eligible cohort members completed baseline and follow-up questionnaires. Participants eligible for the current analysis were controls in nested case-control studies of breast, colorectal, or prostate cancer or for biomarker studies (N=7,216).

Epidemiologic Architecture for Genes Linked to Environment (EAGLE) accesses the genetic component of three National Health and Nutrition Examination Surveys (NHANES; n~15,000): NHANES III (phase 2 collected between 1991 and 1994), NHANES 1999-2000, and NHANES 2001-2002[8-10]. NHANES is a

U.S. population-based, cross-sectional survey of Americans ranging in age from infants to the elderly ascertained regardless of health status, conducted by the National Center for Health Statistics at the Centers for Disease Control and Prevention. In general, DNA samples collected for NHANES on participants 12 years of age or older are linked to survey responses related to demographic, health, and lifestyle as well as data from a physical examination and >100 laboratory measures.

#### *Data collection*

**BMI:** In EAGLE, all CALiCo studies, and WHI, BMI was calculated from height and weight measured at time of study enrollment in a clinic setting. In WHI only, measurements collected 1 or 3 years after enrollment were substituted for 140 participants missing enrollment height and/or weight. In the MEC, self-reported height and weight were used to calculate baseline BMI.

**Smoking status:** Current smokers were identified in the MEC, WHI, and ARIC by asking subjects whether they were current smokers and in CHS by asking subjects whether they had smoked in the past 30 days. In EAGLE, current smoking for NHANES participants was defined by the answer “yes” to the question “do you smoke cigarettes now?” or if cotinine levels were >15ng/ml. In SHS and SHFS, Tobacco exposure was quantified using standardized questionnaires.

**Racial/ethnic group:** In all studies, self-reported Racial/ethnic group was collected via questionnaire at baseline.

#### *DNA extraction*

In the MEC and WHI, DNA was purified from buffy coat samples. A subset of MEC DNA samples were whole-genome amplified by Molecular Staging Inc. following their standard protocol [11]. For CALiCo, DNA was extracted from blood samples drawn at baseline. For EAGLE, NHANES III DNA samples are

crude cell lysates obtained from Epstein-Barr Virus transformed lymphocyte cell lines [12]. DNA samples from NHANES 1999-2000 and 2001-2002 were purified from blood using standard methods.

### *Genotyping*

MEC: Genotyping was conducted at the Cancer Research Center of Hawaii (CRCH) and at the University of Southern California (USC). Genotyping at CRCH was performed using the AB OpenArray genotyping while genotyping at USC was performed using the TaqMan platform. To assess inter-study (within PAGE) and inter-lab (within the MEC) concordance, all SNPs were typed on 375 HapMap samples. The concordance between the CRCH and USC labs was 99.9% for the 8 BMI SNPs genotyped in MEC. In addition, 8.8% blinded duplicate samples were included: resulting in >99.3% concordance.

WHI: Genotyping was performed at the Translational Genomics Research Institute (Phoenix, AZ) on Illumina's BeadXpress Reader using Illumina's Veracode GoldenGate genotyping assay, following the manufacturer's recommended protocol (Reference: [www.illumina.com](http://www.illumina.com)). Image data were imported into Illumina's GenomeStudio software. Genotype calls were made using a GenCall cutoff of 0.25. Each batch of ~500 samples included 12 pairs of blind duplicate controls for quality control, with a total of 376 pairs. Overall concordance between pairs was 96.3%.

CALiCo: The majority of genotyping for all sites was performed at the CALiCo central laboratory in Houston, TX using the TaqMan platform using appropriate duplicates and controls. Genotypes were called using the Applied Biosystem Autocaller 3.1 software, subject to manual review. A subset of CHS and ARIC genotypes (rs10838738, rs1333026, rs2815752, rs3751812, and rs8050136) was obtained from previous GWAS studies[13] using either the Illumina 370CNV BeadChip system (CHS) or the Affymetrix Genome-Wide Human SNP Array 6.0 (Santa Clara, CA) (ARIC). For all genotyping platforms, SNPs were excluded if the minor allele frequency was less than 1%, or if they deviated from Hardy-Weinberg expectations ( $p < 5 \times 10^{-5}$ ). Participants were excluded if their genotypes exhibited discordance with prior

genotyping, or call rate < 95%. Imputation for four SNPs (rs10838738, rs10938397, rs7498665, and rs3751812) in European American ARIC subjects only was performed using BIMBAM v0.99 with reference to HapMap CEU using release 22, build 36 using one round of imputations and the default expectation-maximization warm-ups and runs. Allele frequencies for imputed SNPs were estimated using the averaged frequencies reported by the other PAGE sites.

EAGLE: For NHANES participants, genotyping was performed by the Vanderbilt DNA Resources Core and the laboratory of Dr. Jonathan Haines, both in Nashville, Tennessee. Genotyping was performed using Sequenom's iPLEX® Gold coupled with MassARRAY MALDI-TOF MS detection (San Diego, CA) and Illumina's BeadXpress with a custom GoldenGate assay (San Diego, CA). All NHANES experimental DNA samples and blinded duplicates supplied by CDC were genotyped, and SNPs reported here passed CDC quality control measures and are available for secondary analyses through the National Center for Health Statistics (NCHS) CDC.

### *Statistical Analysis*

For EAGLE, all statistical analyses for NHANES data (i.e., genetic data linked to NHANES data) were conducted remotely with SAS software v9.2 [14](SAS Institute, Cary, NC) using the Analytic Data Research by Email (ANDRE) portal of the CDC Research Data Center (RDC) in Hyattsville, Maryland. Data from CHS was analyzed using R[15] (R Foundation for Statistical Computing, Vienna, Austria), data from SHFC was analyzed using SOLAR [16](San Antonio, TX), data from WHI was analyzed using Stata 10 [17] (StataCorp, College Station, TX), and data from all other sites was analyzed using SAS software v9.2. LD plots and blocks were constructed in HaploView 4.2 (Broad Institute, Cambridge, MA) [18] using data from the International HapMap Project (Version 3, Release R2)[19] and the confidence intervals method for blocks described in Gabriel et al.[20].



## References

1. *The Atherosclerosis Risk in Communities (ARIC) Study: design and objectives. The ARIC investigators.* Am J Epidemiol, 1989. **129**(4): p. 687-702.
2. Hughes, G.H., et al., *Recruitment in the Coronary Artery Disease Risk Development in Young Adults (Cardia) Study.* Control Clin Trials, 1987. **8**(4 Suppl): p. 68S-73S.
3. Fried, L.P., et al., *The Cardiovascular Health Study: design and rationale.* Ann Epidemiol, 1991. **1**(3): p. 263-76.
4. Lee, E.T., et al., *The Strong Heart Study. A study of cardiovascular disease in American Indians: design and methods.* Am J Epidemiol, 1990. **132**(6): p. 1141-55.
5. North, K.E., et al., *Genetic and environmental contributions to cardiovascular disease risk in American Indians: the strong heart family study.* Am J Epidemiol, 2003. **157**(4): p. 303-14.
6. *Design of the Women's Health Initiative clinical trial and observational study. The Women's Health Initiative Study Group.* Control Clin Trials, 1998. **19**(1): p. 61-109.
7. Kolonel, L.N., et al., *A multiethnic cohort in Hawaii and Los Angeles: baseline characteristics.* Am J Epidemiol, 2000. **151**(4): p. 346-57.
8. National Center for Health Statistics, *Plan and Operation of the Third National Health and Nutrition Examination Survey, 1988-94 (1994)* Hyattsville, MD: National Center for Health Statistics. (Vital and Health Statistics, Series 1: Programs and Collection Procedures, no. 32) (DHHS publication no. (PHS) 94-1308) (GPO no. 017-022-01260-0).
9. Chang, M.H., et al., *Prevalence in the United States of selected candidate gene variants: Third National Health and Nutrition Examination Survey, 1991-1994.* Am J Epidemiol, 2009. **169**(1): p. 54-66.
10. *National Health and Nutrition Examination Survey (NHANES) DNA Samples: Guidelines for Proposals to Use Samples and Cost Schedule, Centers for Disease Control and Prevention.* Fed Regist, 2010. **75**(108): p. 32191-32195.
11. Dean, F.B., et al., *Comprehensive human genome amplification using multiple displacement amplification.* Proc Natl Acad Sci U S A, 2002. **99**(8): p. 5261-6.
12. Steinberg, K.K., et al., *DNA banking in epidemiologic studies.* Epidemiol Rev, 1997. **19**(1): p. 156-62.
13. Psaty, B.M., et al., *Cohorts for Heart and Aging Research in Genomic Epidemiology (CHARGE) Consortium: Design of prospective meta-analyses of genome-wide association studies from 5 cohorts.* Circ Cardiovasc Genet, 2009. **2**(1): p. 73-80.
14. SAS Institute, *SAS 9.2 software.* 2008.
15. R Development Core Team, *R: A Language and Environment for Statistical Computing.* 2010, R Foundation for Statistical Computing: Vienna, Austria.
16. Almasy, L. and J. Blangero, *Multipoint quantitative-trait linkage analysis in general pedigrees.* Am J Hum Genet, 1998. **62**(5): p. 1198-211.
17. StataCorp, *Stata Statistical Software: Release 10.* 2007: College Station, TX.
18. Barrett, J.C., et al., *Haploview: analysis and visualization of LD and haplotype maps.* Bioinformatics, 2005. **21**(2): p. 263-5.
19. *The International HapMap Project.* Nature, 2003. **426**(6968): p. 789-96.
20. Gabriel, S.B., et al., *The structure of haplotype blocks in the human genome.* Science, 2002. **296**(5576): p. 2225-9.
